# Supplementary material for: Hourly mass and snow energy balance measurements from Mammoth Mountain, CA USA, 2011–2017
Source: Copernicus journal article supplement (doi:10.5194/essd-10-549-2018), 2018-03-14
Supplement: Supplementary file [file essd-10-549-2018-supplement-title-page.pdf › essd-10-549-2018-supplement-title-page.pdf]

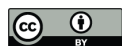

## *Supplement of*

# **Hourly mass and snow energy balance measurements from Mammoth Mountain, CA USA, 2011–2017**

**Edward H. Bair et al.**

*Correspondence to:* Edward H. Bair ([nbair@eri.ucsb.edu](mailto:nbair@eri.ucsb.edu))

- [essd-10-549-2018-supplement-title-page.pdf](#)
- [MHP2011to2017\\_SnowDepth\\_SWE\\_Precip.csv](#)
- [cues2011to2017\\_Radiation\\_Albedo\\_WindSpeed\\_GroundTemp\\_AirTemp\\_RH\\_AirPressure\\_SnowDepth\\_SWE.csv](#)
- [sesame2011to2017\\_AirTemp\\_RH\\_SnowDepth\\_SWE.csv](#)
- [sesame2011to2017manualPrecipitation\\_and\\_notes.csv](#)

The copyright of individual parts of the supplement might differ from the CC BY 4.0 License.
